# Supplementary material for: The In Silico Prediction of Hotspot Residues that Contribute to the Structural Stability of Subunit Interfaces of a Picornavirus Capsid
Source: MDPI journal article supplement (doi:10.3390/v12040387), 2020-03-31
Supplement: s1 [file s1]

**Table S1.** Programs that detected hotspot residues at the intraprotomer interface [1].

| Protein                  | Residue | KFC2 | ROBETTA | Hot<br>Region | PredHS | PPCheck |
|--------------------------|---------|------|---------|---------------|--------|---------|
| <i>VP1-VP2 Interface</i> |         |      |         |               |        |         |
| VP1                      | E6      |      |         |               |        |         |
|                          | R94     |      |         |               |        |         |
|                          | W95     |      |         |               |        |         |
|                          | V96     |      |         |               |        |         |
|                          | Y124    |      |         |               |        |         |
|                          | W202    |      |         |               |        |         |
|                          | F203    |      |         |               |        |         |
|                          | N204    |      |         |               |        |         |
|                          | W206    |      |         |               |        |         |
|                          | F215    |      |         |               |        |         |
|                          | R249    |      |         |               |        |         |
|                          | L252    |      |         |               |        |         |
|                          | F253    |      |         |               |        |         |
|                          | T260    |      |         |               |        |         |
| VP2                      | E133    |      |         |               |        |         |
|                          | F134    |      |         |               |        |         |
|                          | Y135    |      |         |               |        |         |
|                          | T136    |      |         |               |        |         |
|                          | E146    |      |         |               |        |         |
|                          | R168    |      |         |               |        |         |
|                          | Y169    |      |         |               |        |         |
|                          | F175    |      |         |               |        |         |
|                          | F176    |      |         |               |        |         |
|                          | M178    |      |         |               |        |         |
|                          | Q185    |      |         |               |        |         |
|                          | Y189    |      |         |               |        |         |
|                          | V211    |      |         |               |        |         |
| <i>VP1-VP3 Interface</i> |         |      |         |               |        |         |
| VP1                      | T31     |      |         |               |        |         |
|                          | V33     |      |         |               |        |         |
|                          | F36     |      |         |               |        |         |
|                          | Y114    |      |         |               |        |         |
|                          | C118    |      |         |               |        |         |
|                          | F119    |      |         |               |        |         |
|                          | F122    |      |         |               |        |         |
|                          | F187    |      |         |               |        |         |
|                          | V189    |      |         |               |        |         |
|                          | R239    |      |         |               |        |         |
|                          | V245    |      |         |               |        |         |

|                                                                  |      |  |  |  |  |  |
|------------------------------------------------------------------|------|--|--|--|--|--|
| VP3                                                              | F246 |  |  |  |  |  |
|                                                                  | F254 |  |  |  |  |  |
|                                                                  | W256 |  |  |  |  |  |
|                                                                  | I272 |  |  |  |  |  |
|                                                                  | I25  |  |  |  |  |  |
|                                                                  | F41  |  |  |  |  |  |
|                                                                  | L44  |  |  |  |  |  |
|                                                                  | L47  |  |  |  |  |  |
|                                                                  | V98  |  |  |  |  |  |
|                                                                  | R100 |  |  |  |  |  |
|                                                                  | F102 |  |  |  |  |  |
|                                                                  | R106 |  |  |  |  |  |
|                                                                  | L112 |  |  |  |  |  |
|                                                                  | V114 |  |  |  |  |  |
|                                                                  | F159 |  |  |  |  |  |
|                                                                  | N160 |  |  |  |  |  |
|                                                                  | F161 |  |  |  |  |  |
|                                                                  | D217 |  |  |  |  |  |
|                                                                  | W229 |  |  |  |  |  |
|                                                                  | Q232 |  |  |  |  |  |
| <i>VP1-VP4 Interface</i>                                         |      |  |  |  |  |  |
| VP1                                                              | K9   |  |  |  |  |  |
|                                                                  | D128 |  |  |  |  |  |
|                                                                  | K241 |  |  |  |  |  |
| <i>VP2-VP3 Interface</i>                                         |      |  |  |  |  |  |
| VP2                                                              | W184 |  |  |  |  |  |
|                                                                  | Q185 |  |  |  |  |  |
|                                                                  | R197 |  |  |  |  |  |
|                                                                  | L230 |  |  |  |  |  |
|                                                                  | S231 |  |  |  |  |  |
| VP3                                                              | F53  |  |  |  |  |  |
|                                                                  | F115 |  |  |  |  |  |
|                                                                  | T116 |  |  |  |  |  |
|                                                                  | L209 |  |  |  |  |  |
| <i>VP2-VP4 Interface</i>                                         |      |  |  |  |  |  |
| VP2                                                              | R32  |  |  |  |  |  |
|                                                                  | L33  |  |  |  |  |  |
|                                                                  | Y36  |  |  |  |  |  |
| <i>VP3-VP4 Interface</i>                                         |      |  |  |  |  |  |
| No residues predicted to be important for stability of interface |      |  |  |  |  |  |

Table S1. Footnotes:

Grey blocks indicate where a program has predicted a residue to be a hotspot. Residues that were detected as hotspots by two or more programs are shown.

**Table S2.** Programs that detected hotspot residues at the interprotomer interface [1].

| Protein                                                          | Residue | KFC2 | ROBETTA | Hot<br>Region | PredHS | PPCheck |
|------------------------------------------------------------------|---------|------|---------|---------------|--------|---------|
| <i>VP1-VP1</i>                                                   |         |      |         |               |        |         |
| VP1                                                              | L160    |      |         |               |        |         |
|                                                                  | I161    |      |         |               |        |         |
|                                                                  | Y163    |      |         |               |        |         |
|                                                                  | W176    |      |         |               |        |         |
|                                                                  | V178    |      |         |               |        |         |
|                                                                  | M45     |      |         |               |        |         |
|                                                                  | L108    |      |         |               |        |         |
| <i>VP1-VP2</i>                                                   |         |      |         |               |        |         |
| VP1                                                              | V24     |      |         |               |        |         |
| <i>VP1-VP3</i>                                                   |         |      |         |               |        |         |
| VP1                                                              | Q30     |      |         |               |        |         |
|                                                                  | F35     |      |         |               |        |         |
|                                                                  | P153    |      |         |               |        |         |
|                                                                  | R171    |      |         |               |        |         |
|                                                                  | P194    |      |         |               |        |         |
| VP3                                                              | Q11     |      |         |               |        |         |
|                                                                  | C13     |      |         |               |        |         |
|                                                                  | S16     |      |         |               |        |         |
|                                                                  | N103    |      |         |               |        |         |
|                                                                  | Q104    |      |         |               |        |         |
|                                                                  | Q173    |      |         |               |        |         |
|                                                                  | I181    |      |         |               |        |         |
|                                                                  | M222    |      |         |               |        |         |
| <i>VP1-VP4</i>                                                   |         |      |         |               |        |         |
| VP4                                                              | Y29     |      |         |               |        |         |
|                                                                  | L35     |      |         |               |        |         |
| <i>VP2-VP3</i>                                                   |         |      |         |               |        |         |
| VP2                                                              | S47     |      |         |               |        |         |
|                                                                  | C48     |      |         |               |        |         |
|                                                                  | Y104    |      |         |               |        |         |
|                                                                  | L105    |      |         |               |        |         |
| VP3                                                              | P131    |      |         |               |        |         |
|                                                                  | F165    |      |         |               |        |         |
|                                                                  | I166    |      |         |               |        |         |
|                                                                  | P168    |      |         |               |        |         |
| <i>VP3-VP3</i>                                                   |         |      |         |               |        |         |
| No residues predicted to be important for stability of interface |         |      |         |               |        |         |
| <i>VP3-VP4</i>                                                   |         |      |         |               |        |         |
| VP4                                                              | Y25     |      |         |               |        |         |

|         |     |  |  |  |  |  |
|---------|-----|--|--|--|--|--|
|         | Y29 |  |  |  |  |  |
| VP4-VP4 |     |  |  |  |  |  |
| VP4     | G18 |  |  |  |  |  |
|         | S26 |  |  |  |  |  |

Table S2. Footnotes:

Grey blocks indicate where a program has predicted a residue to be a hotspot.  
Residues that were detected as hotspots by two or more programs are shown.

**Table S3.** Programs that detected hotspot residues at the interpentamer interface [1].

| Protein                                                          | Residue | KFC2 | ROBETTA | Hot<br>Region | PredHS | PPCheck |
|------------------------------------------------------------------|---------|------|---------|---------------|--------|---------|
| <i>VP1-VP2</i>                                                   |         |      |         |               |        |         |
| No residues predicted to be important for stability of interface |         |      |         |               |        |         |
| <i>VP2-VP2</i>                                                   |         |      |         |               |        |         |
| VP2                                                              | T53     |      |         |               |        |         |
|                                                                  | V56     |      |         |               |        |         |
|                                                                  | L57     |      |         |               |        |         |
|                                                                  | V95     |      |         |               |        |         |
|                                                                  | R102    |      |         |               |        |         |
|                                                                  | L259    |      |         |               |        |         |
| <i>VP2-VP3</i>                                                   |         |      |         |               |        |         |
| VP2                                                              | N25     |      |         |               |        |         |
|                                                                  | R61     |      |         |               |        |         |
|                                                                  | Y62     |      |         |               |        |         |
|                                                                  | Y63     |      |         |               |        |         |
|                                                                  | T64     |      |         |               |        |         |
|                                                                  | N117    |      |         |               |        |         |
| VP3                                                              | S240    |      |         |               |        |         |
|                                                                  | K124    |      |         |               |        |         |
|                                                                  | R140    |      |         |               |        |         |
|                                                                  | M144    |      |         |               |        |         |
|                                                                  | Y148    |      |         |               |        |         |
|                                                                  | I150    |      |         |               |        |         |
|                                                                  | D152    |      |         |               |        |         |
|                                                                  | L153    |      |         |               |        |         |
|                                                                  | T194    |      |         |               |        |         |
|                                                                  | P195    |      |         |               |        |         |
|                                                                  | T197    |      |         |               |        |         |
|                                                                  | Y198    |      |         |               |        |         |
| <i>VP2-4</i>                                                     |         |      |         |               |        |         |
| No residues predicted to be important for stability of interface |         |      |         |               |        |         |

Table S3. Footnotes:

Grey blocks indicate where a program has predicted a residue to be a hotspot. Residues that were detected as hotspots by two or more programs are shown.

|              |       |       |          |                    | 1    | 10                                                     | 20                                                                        |
|--------------|-------|-------|----------|--------------------|------|--------------------------------------------------------|---------------------------------------------------------------------------|
| GDVII_A      |       |       |          |                    |      |                                                        | GIDNAEKGKVSNDSDASVDFVAEPVKLPEN                                            |
| 2MEV_1       | PDBID | CHAIN | SEQUENCE |                    |      |                                                        | GVENAEGVTENTDATADFVAQPVYLPEN                                              |
| 5A8F_A       | PDBID | CHAIN | SEQUENCE |                    |      |                                                        |                                                                           |
| 3CJI_A       | PDBID | CHAIN | SEQUENCE |                    |      |                                                        | STDNAETGVIEAGNTDTSFSGELAAPGSN                                             |
| 1FMD_1       | PDBID | CHAIN | SEQUENCE |                    |      |                                                        | TT...TTGESADPVTTTVENYGGGETQVQRRH                                          |
| 5ACA_1       | PDBID | CHAIN | SEQUENCE |                    |      |                                                        | TT...SSGEGADVTTTDPSTHGGAVTEKKRV                                           |
| 2XBO_1       | PDBID | CHAIN | SEQUENCE |                    |      |                                                        | VTNVGEDGEPGETEPRHALSPVDMHV                                                |
| 3VBF_A       | PDBID | CHAIN | SEQUENCE | GDRVADVIESSIGDSVSR | ALTH | ALPAPTGQNTQVSSHRLDTGKVPALQAAEIGASSNASDESMIETRCVLNSHSTA |                                                                           |
| 1R08_1       | PDBID | CHAIN | SEQUENCE |                    |      |                                                        | GLGDELEEVIVEKTKQTVASISSGPKHTQKVPILTANETGATMPVLPSPDSIETRTTMYMHFNCS         |
| 1FPN_1       | PDBID | CHAIN | SEQUENCE |                    |      |                                                        | NPVENYIDEVLNEVLVVPNINSSNPTTSNSAPALDAAETGHTSSVQPEDVIETRYVQTSQTRD           |
| 1RHI_1       | PDBID | CHAIN | SEQUENCE |                    |      |                                                        | GLSDELEEVIVEKTKQTASVSSGPKHTQSVLPALTANETGATLPTRPSDNVETRTTMYMHFNCS          |
| 2PLV_1       | PDBID | CHAIN | SEQUENCE |                    |      |                                                        | GLGQMLSESMIDNTVSSTVGAATSRDALPNTASGPTHSEIPALTAVETGATNPLVPSDTVQTRHVVQHRSSRS |
| 1D4M_1       | PDBID | CHAIN | SEQUENCE |                    | GD   | VEEA                                                   | IERAVVHVADTMRSGPSNSASVPALTAVETGHTSQVTPSDTMQTRHVKNYHSRS                    |
| 4WM7_A       | PDBID | CHAIN | SEQUENCE |                    |      | V                                                      | ESIIKTATDTVKSEINAELGVVPSLNAVETGATSNTEPEEAIQTRTVINQHGVS                    |
| consensus>70 |       |       |          |                    |      |                                                        | e e                                                                       |

|              |       |       |          |  | 30           | 40         | 50        | 60        | 70                              | 80        | 90 | 100 |
|--------------|-------|-------|----------|--|--------------|------------|-----------|-----------|---------------------------------|-----------|----|-----|
| GDVII_A      |       |       |          |  | QTRVAFYDRAVP | IGMLRPGQNM | ET.TFSYQE | NDFRNLCLL | LTPLPSYCPDSSSGPVRTKAPVQWRWVRSGG | ANGANFPLM |    |     |
| 2MEV_1       | PDBID | CHAIN | SEQUENCE |  | QTRVAFYDRAVP | IGMLRPGQNM | ET.TFSYQE | NDFRNLCLL | LTPLPSYCPDSSSGPVRTKAPVQWRWVRSGG | ANGANFPLM |    |     |
| 5A8F_A       | PDBID | CHAIN | SEQUENCE |  | QTRVAFYDRAVP | IGMLRPGQNM | ET.TFSYQE | NDFRNLCLL | LTPLPSYCPDSSSGPVRTKAPVQWRWVRSGG | ANGANFPLM |    |     |
| 3CJI_A       | PDBID | CHAIN | SEQUENCE |  | QTRVAFYDRAVP | IGMLRPGQNM | ET.TFSYQE | NDFRNLCLL | LTPLPSYCPDSSSGPVRTKAPVQWRWVRSGG | ANGANFPLM |    |     |
| 1FMD_1       | PDBID | CHAIN | SEQUENCE |  | QTRVAFYDRAVP | IGMLRPGQNM | ET.TFSYQE | NDFRNLCLL | LTPLPSYCPDSSSGPVRTKAPVQWRWVRSGG | ANGANFPLM |    |     |
| 5ACA_1       | PDBID | CHAIN | SEQUENCE |  | QTRVAFYDRAVP | IGMLRPGQNM | ET.TFSYQE | NDFRNLCLL | LTPLPSYCPDSSSGPVRTKAPVQWRWVRSGG | ANGANFPLM |    |     |
| 2XBO_1       | PDBID | CHAIN | SEQUENCE |  | QTRVAFYDRAVP | IGMLRPGQNM | ET.TFSYQE | NDFRNLCLL | LTPLPSYCPDSSSGPVRTKAPVQWRWVRSGG | ANGANFPLM |    |     |
| 3VBF_A       | PDBID | CHAIN | SEQUENCE |  | QTRVAFYDRAVP | IGMLRPGQNM | ET.TFSYQE | NDFRNLCLL | LTPLPSYCPDSSSGPVRTKAPVQWRWVRSGG | ANGANFPLM |    |     |
| 1R08_1       | PDBID | CHAIN | SEQUENCE |  | QTRVAFYDRAVP | IGMLRPGQNM | ET.TFSYQE | NDFRNLCLL | LTPLPSYCPDSSSGPVRTKAPVQWRWVRSGG | ANGANFPLM |    |     |
| 1FPN_1       | PDBID | CHAIN | SEQUENCE |  | QTRVAFYDRAVP | IGMLRPGQNM | ET.TFSYQE | NDFRNLCLL | LTPLPSYCPDSSSGPVRTKAPVQWRWVRSGG | ANGANFPLM |    |     |
| 1RHI_1       | PDBID | CHAIN | SEQUENCE |  | QTRVAFYDRAVP | IGMLRPGQNM | ET.TFSYQE | NDFRNLCLL | LTPLPSYCPDSSSGPVRTKAPVQWRWVRSGG | ANGANFPLM |    |     |
| 2PLV_1       | PDBID | CHAIN | SEQUENCE |  | QTRVAFYDRAVP | IGMLRPGQNM | ET.TFSYQE | NDFRNLCLL | LTPLPSYCPDSSSGPVRTKAPVQWRWVRSGG | ANGANFPLM |    |     |
| 1D4M_1       | PDBID | CHAIN | SEQUENCE |  | QTRVAFYDRAVP | IGMLRPGQNM | ET.TFSYQE | NDFRNLCLL | LTPLPSYCPDSSSGPVRTKAPVQWRWVRSGG | ANGANFPLM |    |     |
| 4WM7_A       | PDBID | CHAIN | SEQUENCE |  | QTRVAFYDRAVP | IGMLRPGQNM | ET.TFSYQE | NDFRNLCLL | LTPLPSYCPDSSSGPVRTKAPVQWRWVRSGG | ANGANFPLM |    |     |
| consensus>70 |       |       |          |  | t.v.f.R.v    |            |           |           |                                 |           |    |     |

|              |       |       |          |  | 110                           | 120 | 130  | 140      | 150        | 160 | 170          |
|--------------|-------|-------|----------|--|-------------------------------|-----|------|----------|------------|-----|--------------|
| GDVII_A      |       |       |          |  | TKQDYAFCLFSPFTYYKCDLEVTVSAMGA |     | GTVS | SVLRWAPT | GAPADVTDLI |     | GYTPSLGETRNP |
| 2MEV_1       | PDBID | CHAIN | SEQUENCE |  | TKQDYAFCLFSPFTYYKCDLEVTVSAMGA |     | GTVS | SVLRWAPT | GAPADVTDLI |     | GYTPSLGETRNP |
| 5A8F_A       | PDBID | CHAIN | SEQUENCE |  | TKQDYAFCLFSPFTYYKCDLEVTVSAMGA |     | GTVS | SVLRWAPT | GAPADVTDLI |     | GYTPSLGETRNP |
| 3CJI_A       | PDBID | CHAIN | SEQUENCE |  | TKQDYAFCLFSPFTYYKCDLEVTVSAMGA |     | GTVS | SVLRWAPT | GAPADVTDLI |     | GYTPSLGETRNP |
| 1FMD_1       | PDBID | CHAIN | SEQUENCE |  | TKQDYAFCLFSPFTYYKCDLEVTVSAMGA |     | GTVS | SVLRWAPT | GAPADVTDLI |     | GYTPSLGETRNP |
| 5ACA_1       | PDBID | CHAIN | SEQUENCE |  | TKQDYAFCLFSPFTYYKCDLEVTVSAMGA |     | GTVS | SVLRWAPT | GAPADVTDLI |     | GYTPSLGETRNP |
| 2XBO_1       | PDBID | CHAIN | SEQUENCE |  | TKQDYAFCLFSPFTYYKCDLEVTVSAMGA |     | GTVS | SVLRWAPT | GAPADVTDLI |     | GYTPSLGETRNP |
| 3VBF_A       | PDBID | CHAIN | SEQUENCE |  | TKQDYAFCLFSPFTYYKCDLEVTVSAMGA |     | GTVS | SVLRWAPT | GAPADVTDLI |     | GYTPSLGETRNP |
| 1R08_1       | PDBID | CHAIN | SEQUENCE |  | TKQDYAFCLFSPFTYYKCDLEVTVSAMGA |     | GTVS | SVLRWAPT | GAPADVTDLI |     | GYTPSLGETRNP |
| 1FPN_1       | PDBID | CHAIN | SEQUENCE |  | TKQDYAFCLFSPFTYYKCDLEVTVSAMGA |     | GTVS | SVLRWAPT | GAPADVTDLI |     | GYTPSLGETRNP |
| 1RHI_1       | PDBID | CHAIN | SEQUENCE |  | TKQDYAFCLFSPFTYYKCDLEVTVSAMGA |     | GTVS | SVLRWAPT | GAPADVTDLI |     | GYTPSLGETRNP |
| 2PLV_1       | PDBID | CHAIN | SEQUENCE |  | TKQDYAFCLFSPFTYYKCDLEVTVSAMGA |     | GTVS | SVLRWAPT | GAPADVTDLI |     | GYTPSLGETRNP |
| 1D4M_1       | PDBID | CHAIN | SEQUENCE |  | TKQDYAFCLFSPFTYYKCDLEVTVSAMGA |     | GTVS | SVLRWAPT | GAPADVTDLI |     | GYTPSLGETRNP |
| 4WM7_A       | PDBID | CHAIN | SEQUENCE |  | TKQDYAFCLFSPFTYYKCDLEVTVSAMGA |     | GTVS | SVLRWAPT | GAPADVTDLI |     | GYTPSLGETRNP |
| consensus>70 |       |       |          |  | ftY.D.E.t                     |     |      |          |            |     | np.vf        |



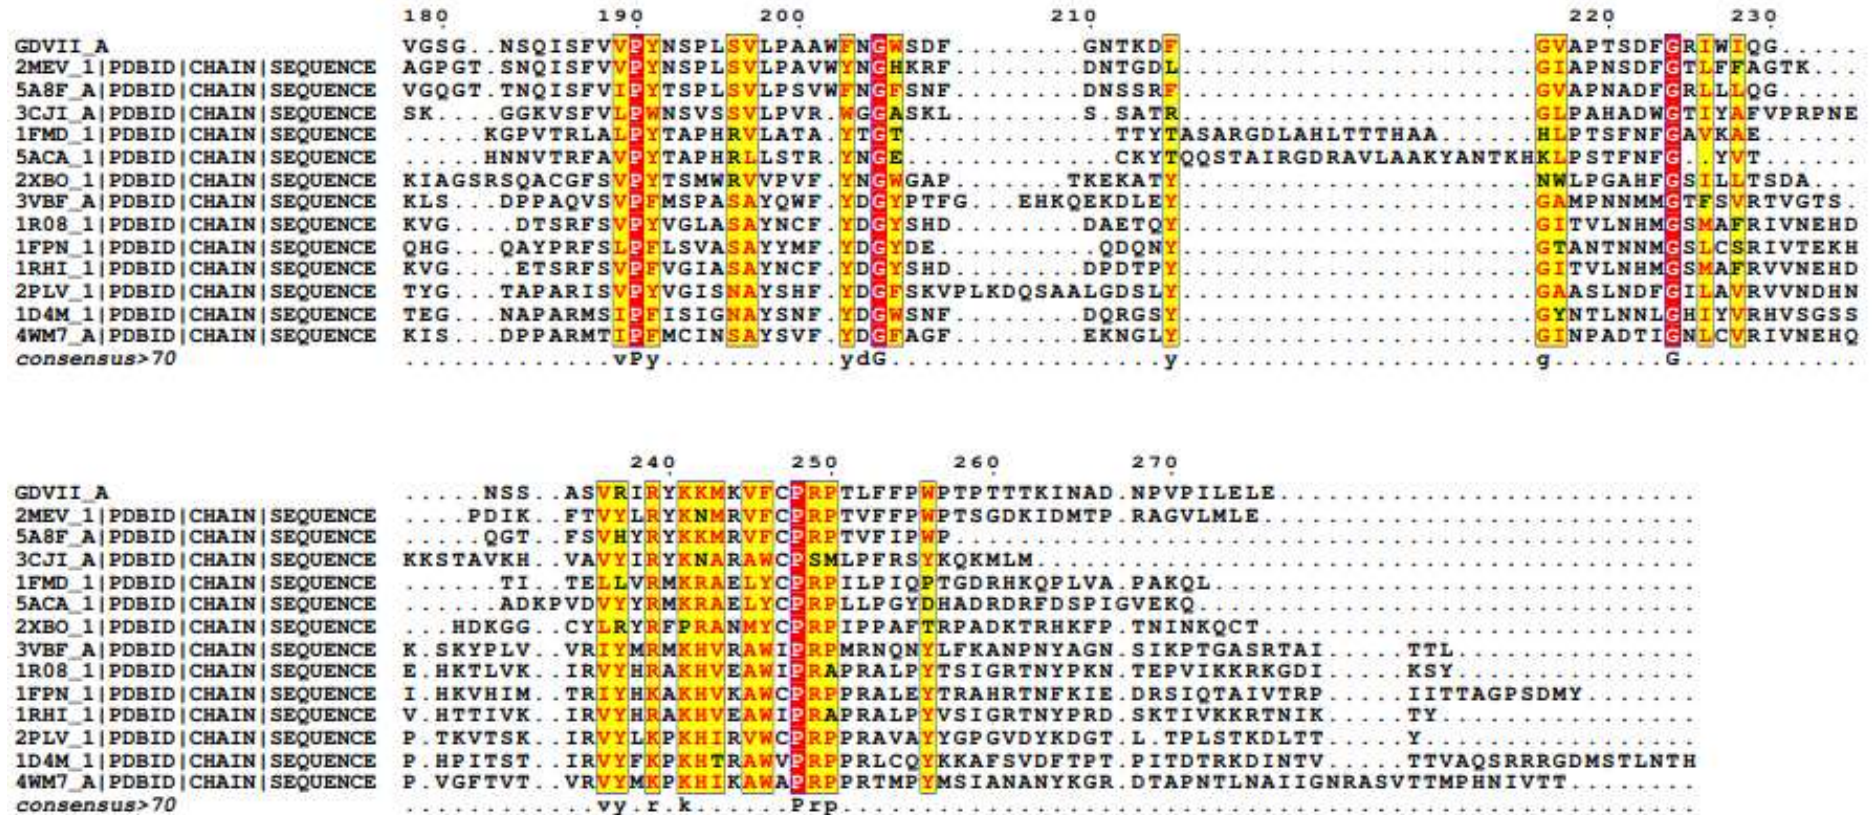

**Figure S1.** Sequence-based alignment of TMEV, cardiovirus, senecavirus, aphthovirus and enterovirus VP1 proteins [1]. VP1 protein sequences were obtained from the PDB database: cardioviruses MEV and SAFV (PDB: 2MEV, 5A8F); senecavirus SVV-1 (PDB: 3CJI); aphthoviruses FMDV type C and SAT 2, ERAV (PDB: 1FMD, 5ACA, 2WFF); and enteroviruses EV-71, HRV-B14, HRV-2, HRV-3, PV-1, CV-A9, EV-D68 (PDB: 3VBF, 1R08, 1FPN, 1RHI, 2PLV, 1D4M, 4WM7); and were submitted to ESript (built into ENDscript) to produce a multiple sequence alignment of the amino acid sequences.

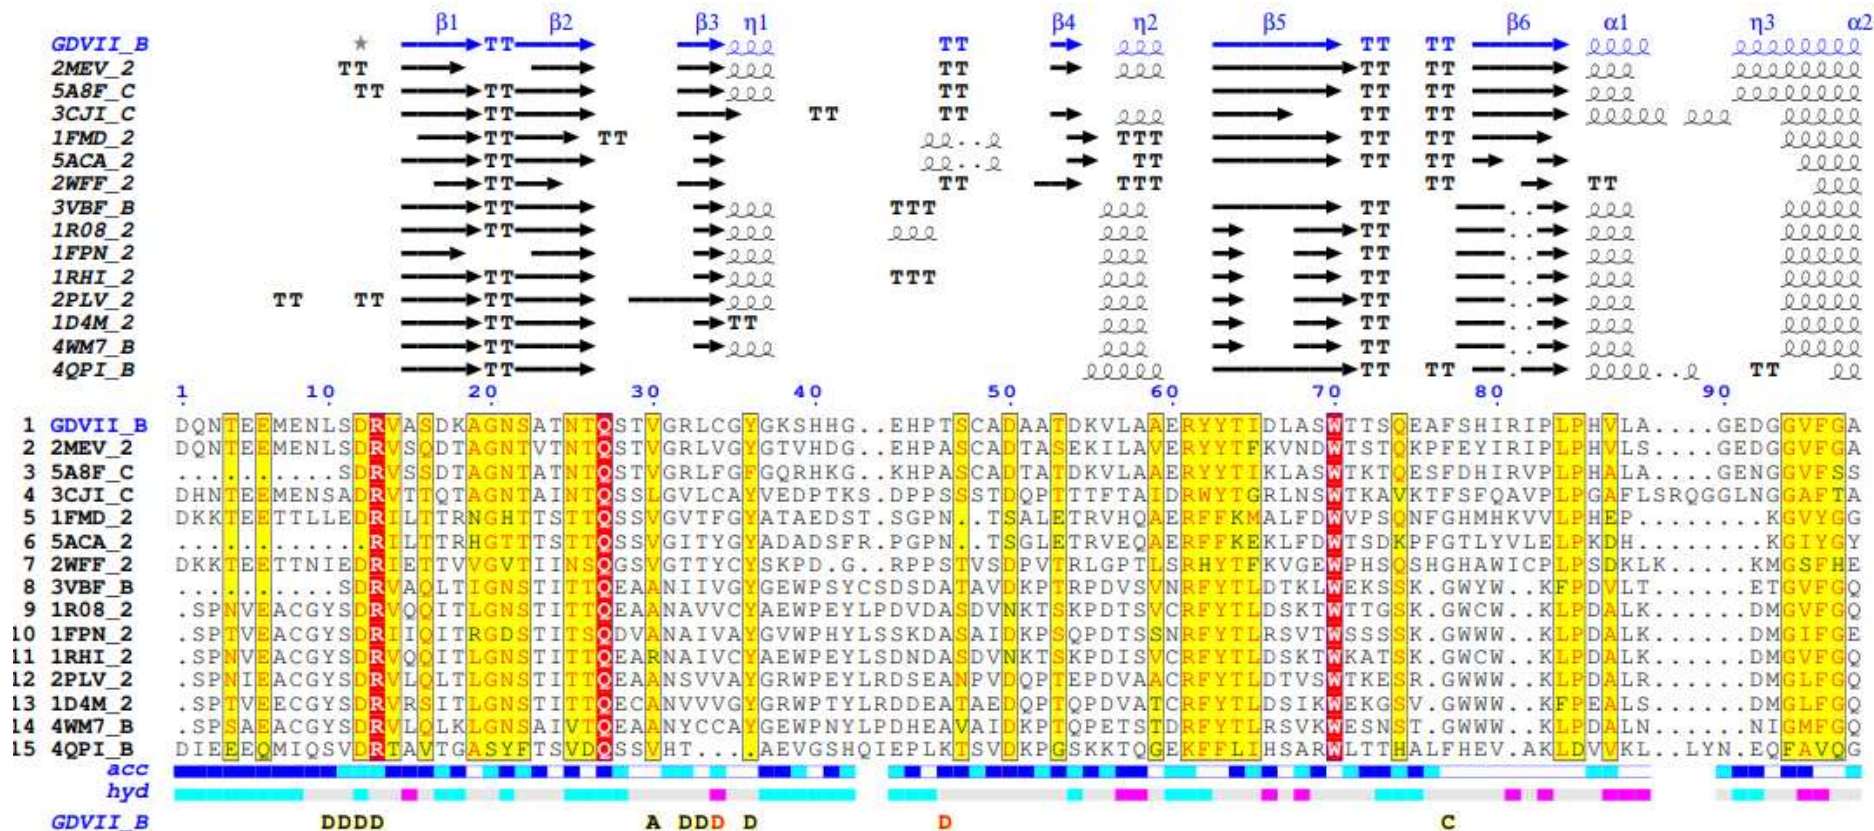



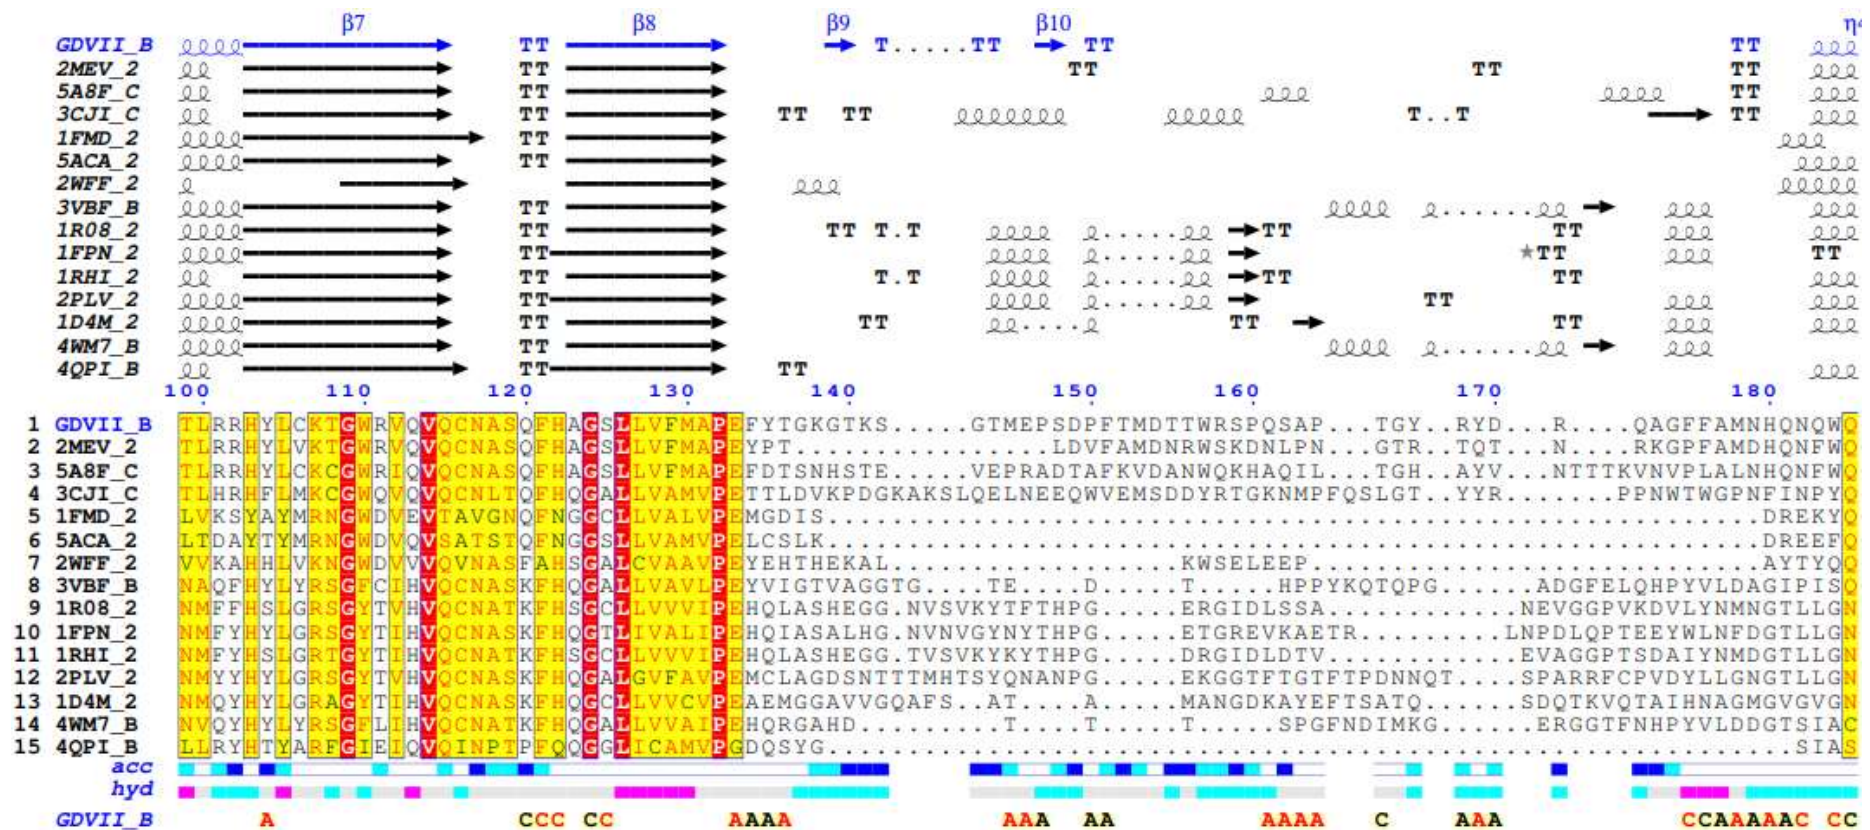

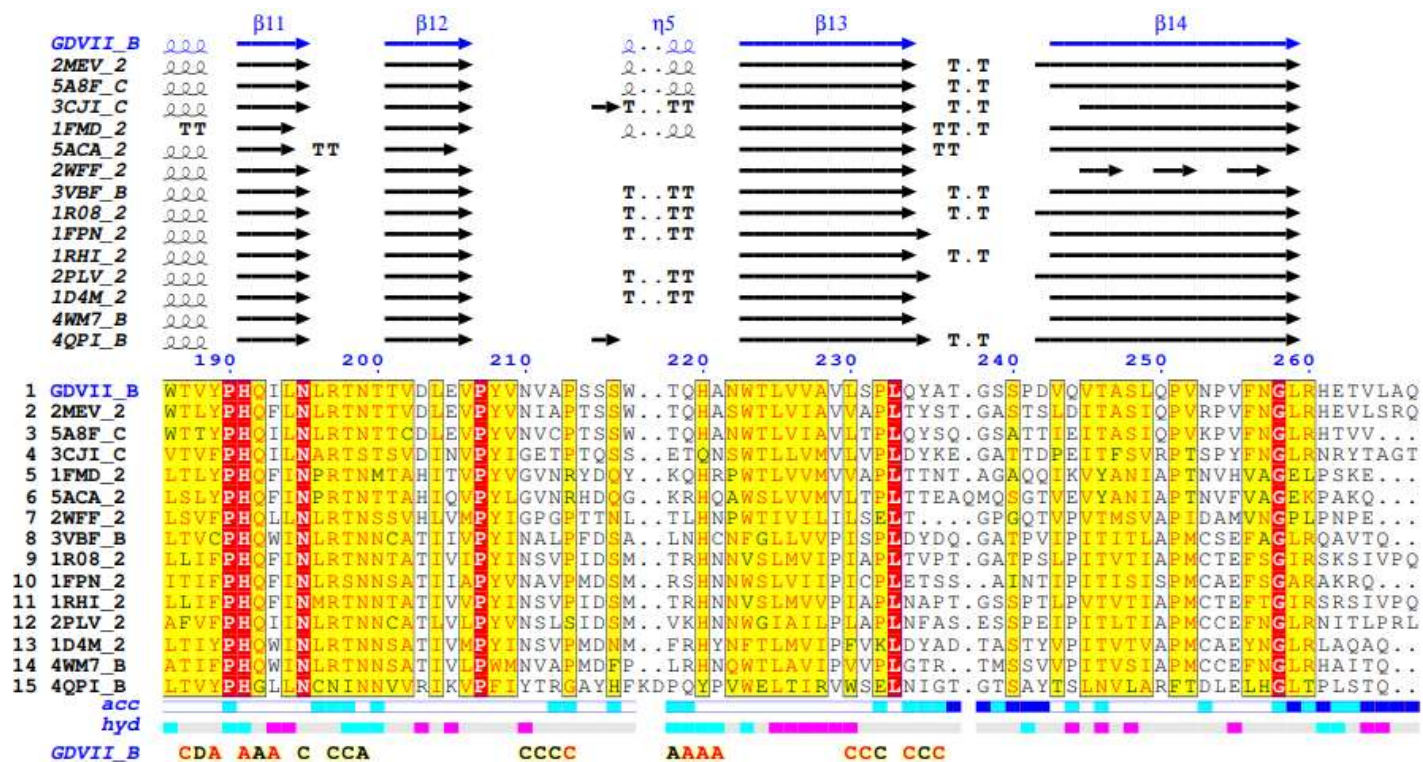

**Figure S2.** Sequence and structure-based alignment of TMEV VP2 with cardiovirus, senecavirus, aphthovirus and enterovirus representatives [1]. Chain B representing VP2 of the TMEV protomer was submitted to ENDscript2. A subset of structures provided by ENDscript2 was selected for the alignment and included: cardioviruses MEV and SAFV (PDB: 2MEV, 5A8F); senecavirus SVV-1 (PDB: 3CJI); aphthoviruses FMDV type C and SAT 2, ERAV (PDB: 1FMD, 5ACA, 2WFF); enteroviruses EV-71, HRV-B14, HRV-2, HRV-3, PV-1, CV-A9, EV-D68 (PDB: 3VBF, 1R08, 1FPN, 1RHI, 2PLV, 1D4M, 4WM7) and HAV (4QPI).



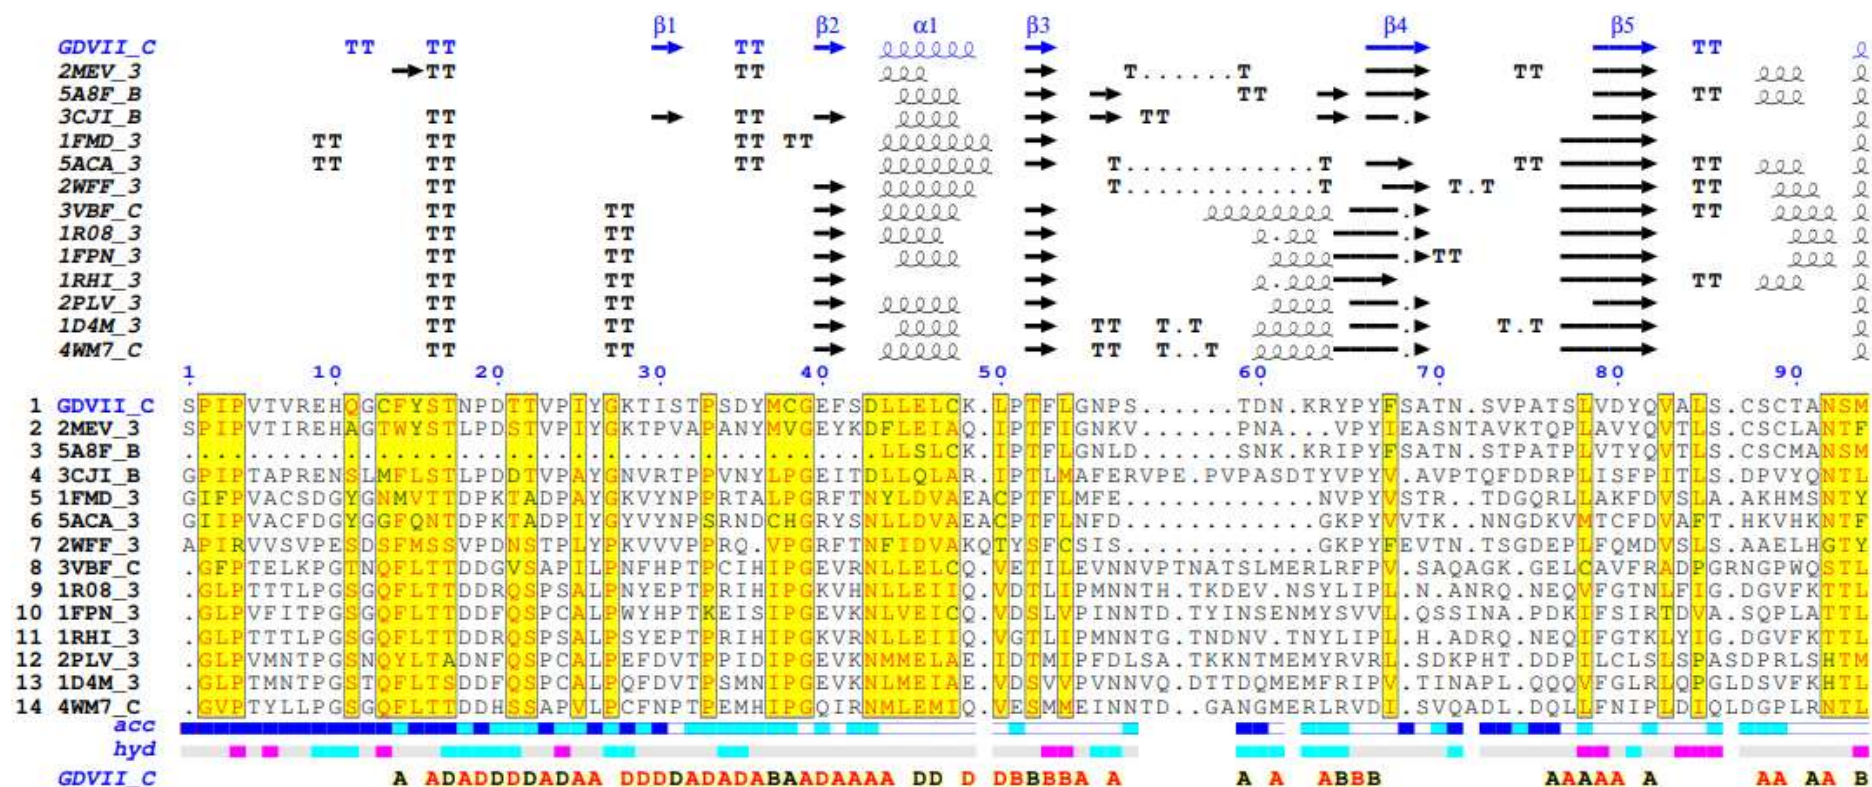

GDVII C

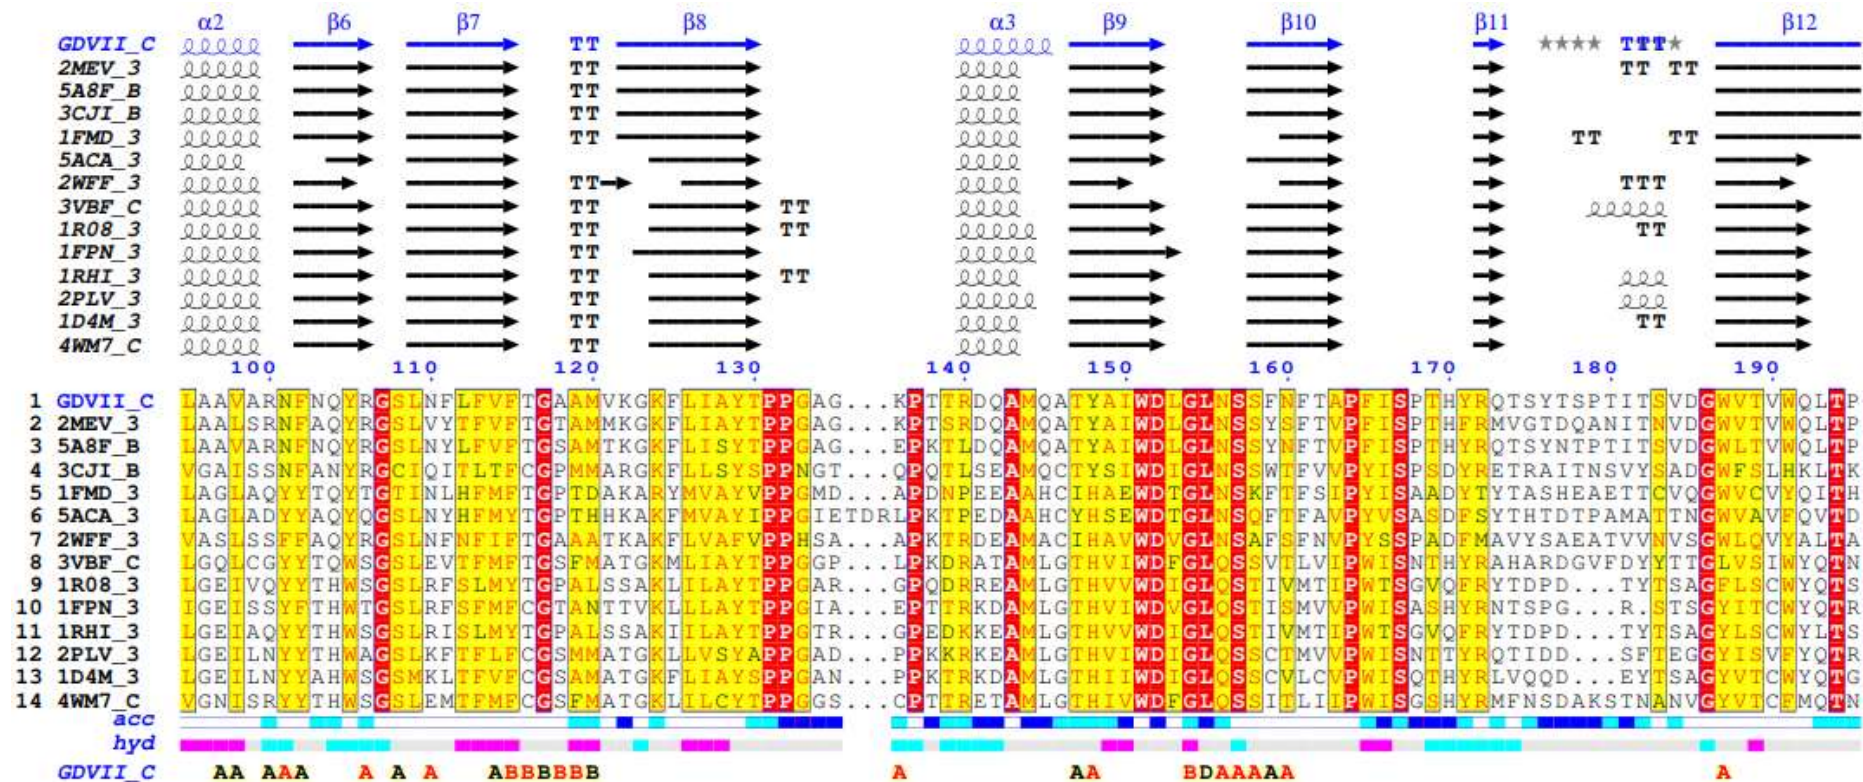



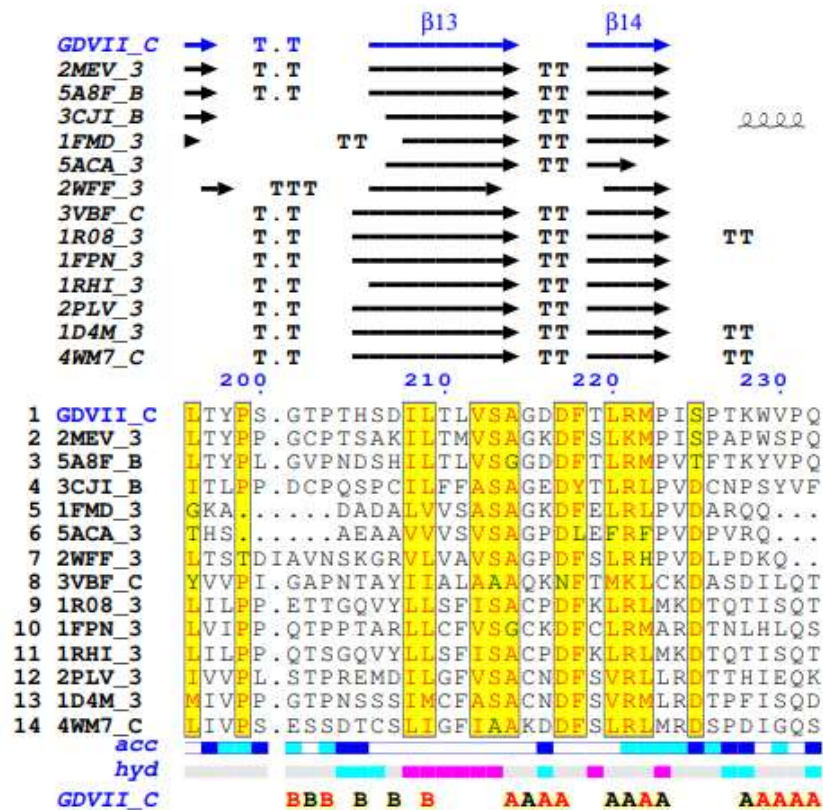

**Figure S3.** Sequence and structure-based alignment of TMEV VP3 with cardiovirus, senecavirus, aphthovirus and enterovirus representatives [1]. Chain C representing VP3 of the TMEV protomer was submitted to ENDscript2. A subset of structures provided by ENDscript2 was selected for the alignment and included: cardioviruses MEV and SAFV (PDB: 2MEV, 5A8F); senecavirus SVV-1 (PDB: 3CJI); aphthoviruses FMDV type C and SAT 2, ERAV (PDB: 1FMD, 5ACA, 2WFF); and enteroviruses EV-71, HRV-B14, HRV-2, HRV-3, PV-1, CV-A9, EV-D68 (PDB: 3VBF, 1R08, 1FPN, 1RHI, 2PLV, 1D4M, 4WM7).

```

1TME_4|PDBID|CHAIN|SEQUENCE  GNASSSDKS...NSQS...SGNE...GVIINN...FYS...NOYQNSTDLASAGGN.....A
1FMD_4|PDBID|CHAIN|SEQUENCE  GAGQSSPAT...GSQNG...SGNT...GSIINN...YYM...QQYQNSMDTQ..LGDNAISGGSNE
5ACA_4|PDBID|CHAIN|SEQUENCE  GAGHSSPVT...GSQNG...SGNT...GSIINN...YYM...QQYQNSMDTQ..LGDNAISGGSNE
3VBS_D|PDBID|CHAIN|SEQUENCE  ...SHENS...NSA...TE...GSTINY...TTI...NYYKDSYAATAGKQS.....L
1R08_4|PDBID|CHAIN|SEQUENCE  GAQVSTQKS...GSH...E...NQ...NLTNGSNQTFVTI...NYYKDAASTSSAGQS.....L
1FPN_4|PDBID|CHAIN|SEQUENCE  GAQVSRQNVGTHSTQ...NSVSN...GSSLN...YFNI...NYYKDAASNGASKLE.....F
1RHI_4|PDBID|CHAIN|SEQUENCE  GAQVSTQKS...GSH...E...NQ...NLTNGSNQTYTVI...NYYKDAASSSAGQS.....F
2PLV_4|PDBID|CHAIN|SEQUENCE  GAQVSSQKV...GAH...ENS...RAYGGSTIN...YTTI...NYYRDSASNAASKQD.....F
1D4M_4|PDBID|CHAIN|SEQUENCE  GAQVSTQKT...GAHETSLSA..AG..NSI..H...YTNI...NYYKDAASNSANRQD.....F
4WM7_D|PDBID|CHAIN|SEQUENCE  GAQVTRQQ...GTH...ENANI...ATNGS...HITYNQINYYKDSYAASASKQD.....F
consensus>70          ga..s.q...g...n...n...n...n...#y#...qn...

1TME_4|PDBID|CHAIN|SEQUENCE  GD.....APQNNQGLSNILGGAANAFATMAPLIL
1FMD_4|PDBID|CHAIN|SEQUENCE  GSTDTTSTHTTNTQNNDFWFKLASSAFSGLFGA...LLA
5ACA_4|PDBID|CHAIN|SEQUENCE  GSTDTTSTHTTNTQNNDFWFKLAAQSAISGLFGA...LLA
3VBS_D|PDBID|CHAIN|SEQUENCE  KQ.....DP.....DKFANPVKDIIFTEMAAPDK
1R08_4|PDBID|CHAIN|SEQUENCE  SM.....DP.....SKFTEPVKDLMLKGAPALN
1FPN_4|PDBID|CHAIN|SEQUENCE  TQ.....DP.....SKFTDPVKOVLEKGIPTIQ
1RHI_4|PDBID|CHAIN|SEQUENCE  SM.....DP.....SKFTEPVKDLMLKGAPALN
2PLV_4|PDBID|CHAIN|SEQUENCE  SQ.....DP.....SKFTEPIKDVLIKTAPELN
1D4M_4|PDBID|CHAIN|SEQUENCE  TQ.....DP.....SKFTEPVKOVMIKSLPALN
4WM7_D|PDBID|CHAIN|SEQUENCE  SQ.....DP.....SKFTEPVVEGLKAGAPVFK
consensus>70          .....dp.....skf.epv.d.l...p.L.

```

**Figure S4.** Sequence-based alignment of TMEV, aphthovirus, cardiovirus and enterovirus VP4 proteins [1]. VP4 protein sequences were obtained from the PDB database: TMEV (PDB: 1TME); aphthoviruses FMDV type C and SAT 2, ERAV (PDB: 1FMD, 5ACA, 2WFF); and enteroviruses EV-71, HRV-B14, HRV-2, HRV-3, PV-1, CV-A9, EV-D68 (PDB: 3VBS, 1R08, 1FPN, 1RHI, 2PLV, 1D4M, 4WM7) and were submitted to ESript (built into ENDscript) to produce a multiple sequence alignment of the amino acid sequences.

#### Reference:

1. Upfold, N.S. Exploring the structural integrity of a picornavirus capsid, Rhodes University, 2019. <http://hdl.handle.net/10962/131837>.
